# Supplementary material for: Terahertz wave emission from the trigonal layered PtBi2
Source: PubMed Central journal article supplement — iScience. 2022 Jun 2;25(7):104511. doi: 10.1016/j.isci.2022.104511 (PMC9204749; doi:10.1016/j.isci.2022.104511), 2022-06-02
Supplement: mmc1.pdf [file mmc1.pdf]

**iScience, Volume 25**

**Supplemental information**

**Terahertz wave emission  
from the trigonal layered PtBi<sub>2</sub>**

**Yu Gao, Yunhe Pei, Tian Xiang, Liang Cheng, and Jingbo Qi**

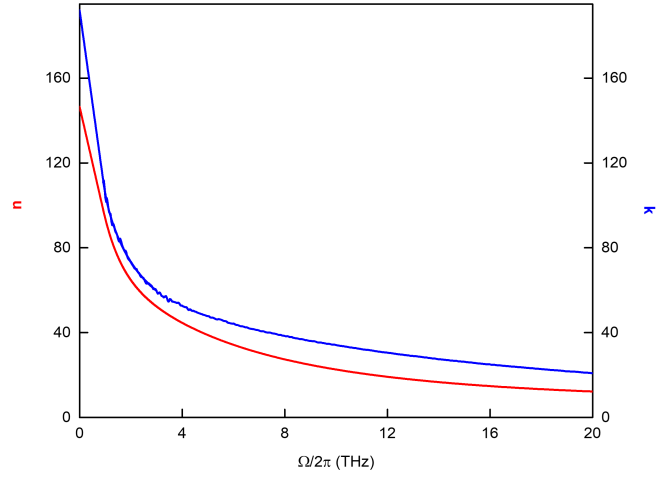

Figure S1: The complex refractive index. This figure is related to “Ultrafast photocurrent calculation and refractive index data” in the STAR methods section. The complex refractive index ( $\tilde{N} = n + ik$ ) of PtBi<sub>2</sub> in THz regime, the red curve represents  $n$ , the blue curve represents  $k$ .

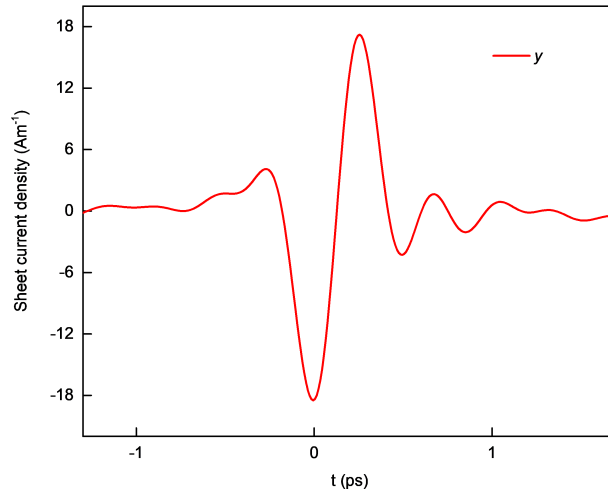

Figure S2: The ultrafast sheet current density. This figure is related to “Ultrafast photocurrent calculation and refractive index data” in the STAR methods section. The ultrafast sheet current density  $J(t)$  from trigonal layered PtBi<sub>2</sub> with  $y$ -polarized pump light.

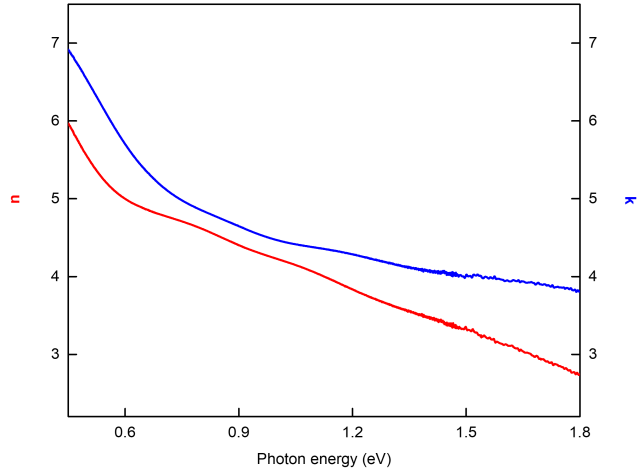

Figure S3: The complex refractive index. This figure is related to “Ultrafast photocurrent calculation and refractive index data” in the STAR methods section. The complex refractive index ( $\tilde{N} = n + ik$ ) of PtBi<sub>2</sub> as the function of photon energy, the red curve represents  $n$ , the blue curve represents  $k$ .

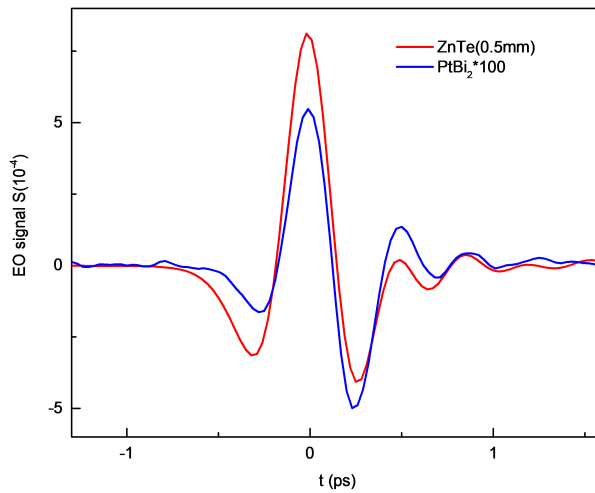

Figure S4: The comparison of THz wave emission between ZnTe and PtBi<sub>2</sub>. This figure is related to the discussion of figure 4 in the main text. THz emission waveform from 0.5-mm-thick ZnTe and PtBi<sub>2</sub> under the same experimental conditions.

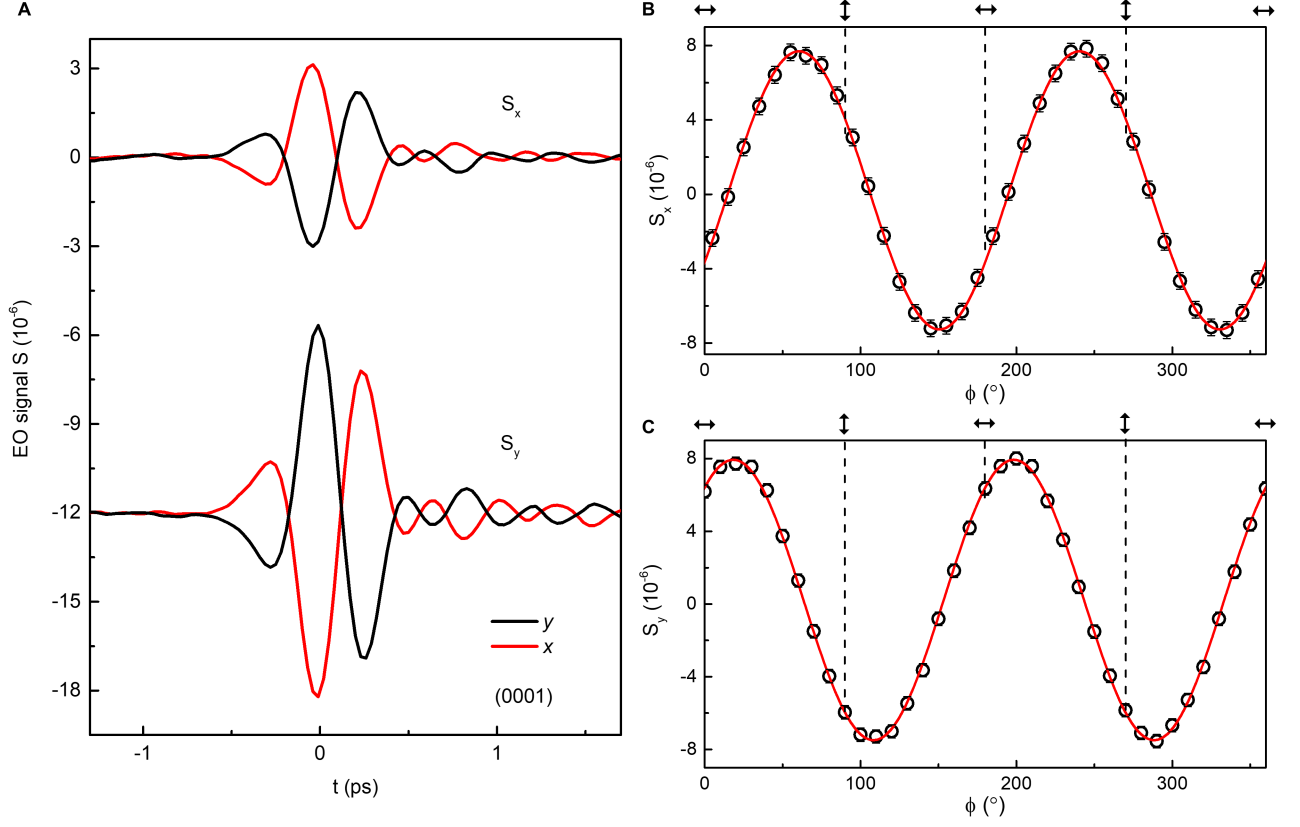

Figure S5: THz EO signal obtained by rotating the HWP angle with pump photon energy of 0.9 eV. This figure is related to figure 2 in the main text. (A) Typical THz EO-signal components  $S_x(t)$  and  $S_y(t)$  measured with  $x$ - and  $y$  polarization pump. (B) and (C) The peak value of  $S_x$  and  $S_y$  (at  $t = 0$  ps) as functions of  $\phi$ , respectively. The red solid curves represent for the fitting based on based on Equations (1) and (2) in the main text.

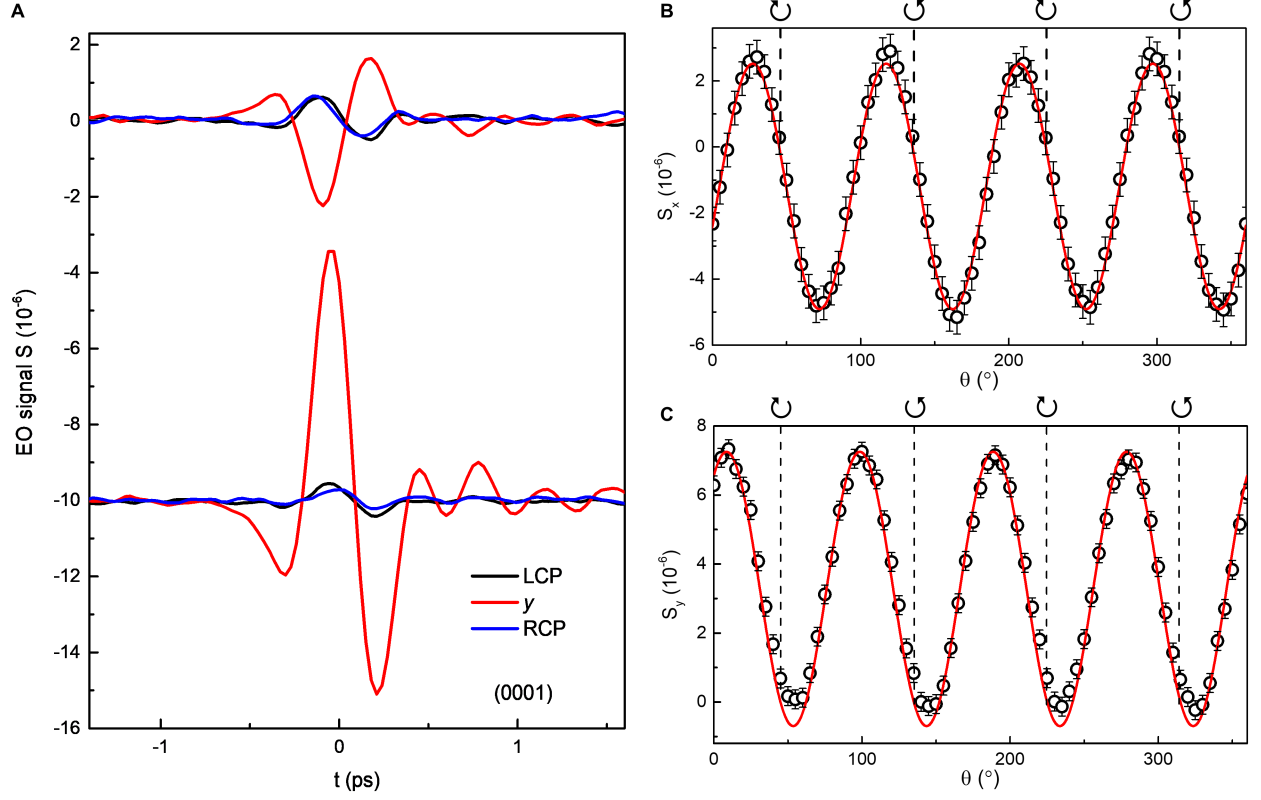

Figure S6: THz EO signal obtained by rotating the QWP angle with pump photon energy of 0.9 eV. This figure is related to figure 3 in the main text. (A) Typical EO signal  $S_x(t)$  and  $S_y(t)$  measured with different pump helicity (different QWP angle  $\theta$ ). Here,  $y$  ( $\theta = 0^\circ$ ), LCP ( $\theta = 45^\circ$ ), and RCP ( $\theta = 135^\circ$ ) represent the  $y$ -polarized, left-hand, and right-hand circular polarized laser pump, respectively. (B) and (C) The peak value of  $S_x$  and  $S_y$  (at  $t = 0$  ps) as functions of QWP angle  $\theta$ . The red solid curves represent for the fitting based on Equations (3) and (4) in the main text.

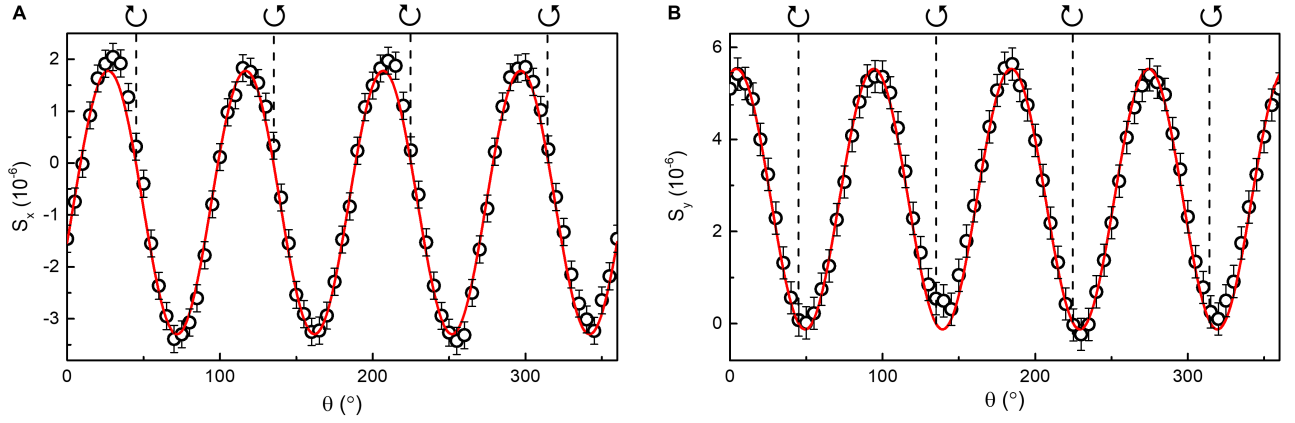

Figure S7: Helicity-dependent THz emission peak value with pump photon energy of 0.7 eV. This figure is related to figure 3 in the main text. (A) and (B) The peak value of  $S_x(t)$  and  $S_y(t)$  (at  $t = 0$  ps) as functions of QWP angle  $\theta$ . The red solid curves represent for the fitting based on Equations (3) and (4) in the main text.

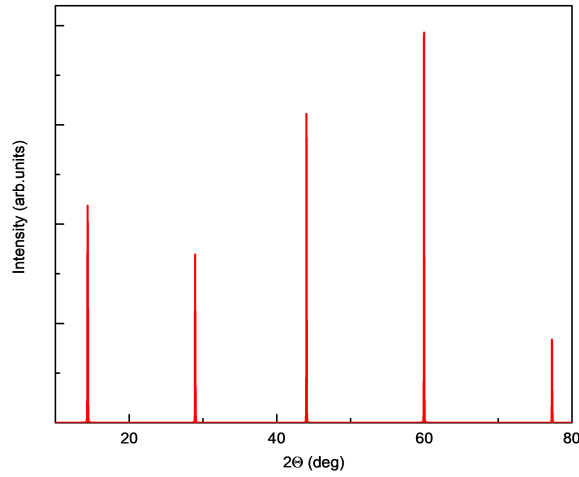

Figure S8: XRD data of PtBi<sub>2</sub>. This figure is related to “Materials details” in the STAR methods section. X-ray diffraction pattern of our PtBi<sub>2</sub> sample.

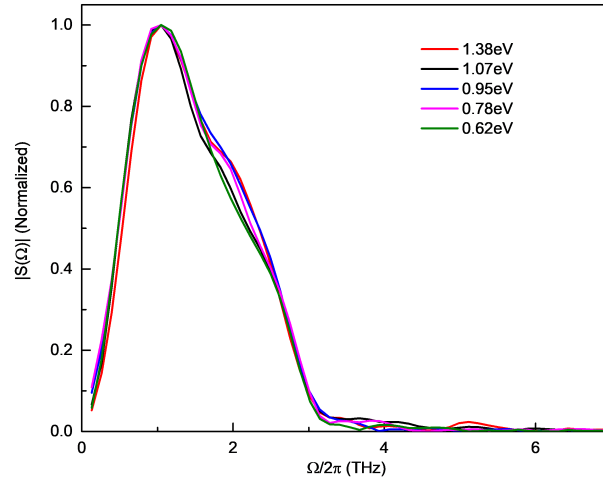

Figure S9: Fourier transform spectra at different pump photon energy. This figure is related to figure 4A in the main text. The Fourier transform spectra  $|S(\Omega)|$  corresponding to the time-domain THz waveforms at different photon energy.
